# Supplementary material for: Meconium Exposure to Phthalates, Sex and Thyroid Hormones, Birth Size and Pregnancy Outcomes in 251 Mother–Infant Pairs from Shanghai
Source: PubMed Central journal article supplement (PMC7659924; doi:10.3390/ijerph17217711), 2020-10-22
Supplement: ijerph-17-07711-s001.pdf [file ijerph-17-07711-s001.pdf]

Table S1. Linear regression analysis of relationship between the phthalate metabolites and body size parameters in overall newborns.

| Phthalate metabolites | BW (g)                |          | BL (cm)               |                  | AC(mm)                |          | AGD(mm)               |          |
|-----------------------|-----------------------|----------|-----------------------|------------------|-----------------------|----------|-----------------------|----------|
|                       | $\beta$ (95%CI)       | <i>P</i> | $\beta$ (95%CI)       | <i>P</i>         | $\beta$ (95%CI)       | <i>P</i> | $\beta$ (95%CI)       | <i>P</i> |
| MMP                   | -0.004 (-0.016,0.008) | 0.464    | 0.002 (-0.001,0.004)  | 0.175            | -0.001 (-0.006,0.004) | 0.778    | 0.021 (-0.049,0.091)  | 0.559    |
| MEP                   | 0.004 (-0.012,0.020)  | 0.607    | 0.003 (<0.001,0.006)  | 0.075            | 0.002 (-0.005,0.008)  | 0.609    | 0.014 (-0.077,0.105)  | 0.761    |
| MnBP                  | -0.008 (-0.017,0.001) | 0.091    | 0.003 (0.001,0.004)   | <b>&lt;0.001</b> | 0.001 (-0.003,0.005)  | 0.673    | -0.011 (-0.063,0.040) | 0.665    |
| MiBP                  | -0.007 (-0.016,0.001) | 0.100    | 0.003 (0.001,0.004)   | <b>&lt;0.001</b> | <0.001 (-0.004,0.003) | 0.926    | 0.013 (-0.036,0.061)  | 0.609    |
| MEHP                  | -0.005 (-0.010,0.001) | 0.131    | 0.002 (0.001,0.003)   | <b>&lt;0.001</b> | 0.001 (-0.001,0.006)  | 0.118    | -0.009 (-0.044,0.026) | 0.610    |
| MEOHP                 | 0.005 (-0.003,0.014)  | 0.205    | 0.001 (-0.001,0.002)  | 0.244            | 0.003 (-0.003,0.002)  | 0.539    | 0.045 (-0.001,0.091)  | 0.055    |
| MECPP                 | 0.002 (-0.004,0.008)  | 0.473    | <0.001 (-0.001,0.001) | 0.842            | <0.001 (-0.005,0.004) | 0.834    | 0.026 (-0.008,0.060)  | 0.129    |
| MEHHP                 | 0.003 (-0.005,0.011)  | 0.410    | 0.001 (-0.001,0.002)  | 0.229            | 0.001 (-0.002,0.004)  | 0.437    | 0.028 (-0.015,0.071)  | 0.197    |
| MCMHP                 | 0.001 (-0.005,0.007)  | 0.851    | <0.001 (-0.001,0.001) | 0.493            | 0.002 (-0.001, 0.004) | 0.201    | 0.024 (-0.009,0.057)  | 0.151    |

BW: birth weight; BL: birth length; AC: abdominal circumference; AGD: anogenital distance;

Models were adjusted for covariates including mother's age, pre-pregnancy BMI, gestational age, sex of newborn, and GDM status.

Bold italic: *P* < 0.05

Table S2. Linear regression analysis of relationship between the phthalate metabolites and body size parameters in overall newborns.

| Phthalate metabolites | HC (mm)               |          | BPD (mm)               |          | FL (mm)               |              |
|-----------------------|-----------------------|----------|------------------------|----------|-----------------------|--------------|
|                       | $\beta$ (95%CI)       | <i>P</i> | $\beta$ (95%CI)        | <i>P</i> | $\beta$ (95%CI)       | <i>P</i>     |
| MMP                   | -0.002 (-0.006,0.002) | 0.429    | 0.001 (-0.004,0.005)   | 0.771    | <0.001 (-0.005,0.005) | 0.892        |
| MEP                   | -0.002 (-0.008,0.003) | 0.391    | -0.001 (-0.007,0.005)  | 0.707    | 0.002 (-0.004,0.009)  | 0.498        |
| MnBP                  | 0.001 (-0.002,0.004)  | 0.494    | 0.002 (-0.002,0.005)   | 0.308    | <0.001 (-0.003,0.004) | 0.803        |
| MiBP                  | <0.001 (-0.003,0.003) | 0.878    | 0.002 (-0.002,0.005)   | 0.351    | <0.001 (-0.004,0.003) | 0.913        |
| MEHP                  | 0.001 (-0.001,0.003)  | 0.351    | 0.001 (-0.001,0.004)   | 0.257    | 0.001 (-0.002,0.003)  | 0.673        |
| MEOHP                 | <0.001 (-0.003,0.003) | 0.993    | <0.001 (-0.003, 0.003) | 0.822    | 0.006 (0.002,0.009)   | <b>0.001</b> |
| MECPP                 | 0.001 (-0.001,0.003)  | 0.170    | 0.002 (-0.001,0.004)   | 0.173    | 0.003 (0.001,0.006)   | <b>0.013</b> |
| MEHHP                 | <0.001 (0.002,0.015)  | 0.868    | -0.001 (-0.004,0.002)  | 0.451    | 0.003 (<0.001,0.007)  | <b>0.034</b> |
| MCMHP                 | 0.002 (<0.001,0.004)  | 0.057    | 0.001 (-0.002,0.003)   | 0.542    | 0.002 (<0.001,0.005)  | 0.053        |

HC: head circumference; BPD: biparietal diameter; FL: femur length.

Models were adjusted for covariates including mother's age, pre-pregnancy BMI, gestational age, sex of newborn, and GDM status.

Bold italic: *P* < 0.05

Table S3. Regression analysis of relationship between the phthalate metabolites and pregnancy outcomes in overall newborns.

| Phthalate metabolites | GDM (mm)            |          | PROM (mm)           |          | Gestational age (mm)  |              |
|-----------------------|---------------------|----------|---------------------|----------|-----------------------|--------------|
|                       | $\beta$ (95%CI)     | <i>P</i> | $\beta$ (95%CI)     | <i>P</i> | $\beta$ (95%CI)       | <i>P</i>     |
| MMP                   | 1.382 (0.926,2.062) | 0.113    | 1.165 (0.845,1.606) | 0.350    | 0.001 (-0.003,0.005)  | 0.533        |
| MEP                   | 1.139 (0.687,1.889) | 0.614    | 1.466 (0.948,2.266) | 0.085    | <0.001 (-0.005,0.006) | 0.941        |
| MnBP                  | 1.230 (0.838,1.804) | 0.290    | 1.112 (0.843,1.467) | 0.451    | 0.002 (<0.001,0.005)  | 0.101        |
| MiBP                  | 1.214 (0.864,1.707) | 0.263    | 1.193 (0.912,1.561) | 0.198    | 0.001 (-0.001,0.004)  | 0.322        |
| MEHP                  | 1.149 (0.892,1.482) | 0.282    | 1.206 (0.970,1.500) | 0.093    | 0.002 (<0.001,0.004)  | <b>0.045</b> |
| MEOHP                 | 0.907 (0.698,1.179) | 0.467    | 1.122 (0.895,1.406) | 0.318    | 0.001 (-0.002,0.003)  | 0.675        |
| MECPP                 | 1.013 (0.836,1.226) | 0.897    | 1.053 (0.895,1.239) | 0.533    | 0.001 (-0.001,0.003)  | 0.602        |
| MEHHP                 | 0.890 (0.002,0.015) | 0.350    | 1.050 (0.848,1.301) | 0.652    | 0.001 (-0.002,0.003)  | 0.538        |
| MCMHP                 | 1.066 (0.879,1.294) | 0.515    | 1.110 (0.943,1.307) | 0.211    | 0.002 (<0.001,0.004)  | 0.126        |

GDM: gestational diabetes; PROM: premature rupture of membrane;

Models were adjusted for covariates including mother's age, pre-pregnancy BMI, gestational age, sex of newborn, and GDM status.

Bold italic: *P* < 0.05

Table S4. Linear regression analysis of relationship between the phthalate metabolites and hormones parameters in overall newborns.

| Phthalate metabolites | E2                    |          | FT                    |          | TSH                    |              |
|-----------------------|-----------------------|----------|-----------------------|----------|------------------------|--------------|
|                       | $\beta$ (95%CI)       | <i>P</i> | $\beta$ (95%CI)       | <i>P</i> | $\beta$ (95%CI)        | <i>P</i>     |
| MMP                   | 0.017 (-0.008,0.042)  | 0.184    | 0.007 (-0.019,0.033)  | 0.589    | -0.031 (-0.059,-0.003) | <b>0.029</b> |
| MEP                   | 0.015 (-0.019,0.048)  | 0.388    | -0.003 (-0.036,0.031) | 0.876    | 0.023 (-0.014,0.060)   | 0.226        |
| MnBP                  | 0.010 (-0.010,0.029)  | 0.321    | 0.009 (-0.010,0.029)  | 0.345    | -0.018 (-0.039,-0.004) | 0.104        |
| MiBP                  | 0.017 (-0.001,0.035)  | 0.058    | 0.005 (-0.013,0.024)  | 0.562    | -0.015 (-0.036,0.005)  | 0.131        |
| MEHP                  | 0.004 (-0.008,0.017)  | 0.505    | 0.003 (-0.010,0.016)  | 0.674    | -0.017 (-0.031,-0.002) | <b>0.022</b> |
| MEOHP                 | 0.011 (-0.006,0.028)  | 0.198    | -0.005 (-0.022,0.013) | 0.590    | 0.014 (-0.005,0.033)   | 0.160        |
| MECPP                 | <0.001 (-0.012,0.013) | 0.954    | -0.009 (-0.021,0.004) | 0.193    | 0.002 (-0.012,0.016)   | 0.786        |
| MEHHP                 | 0.008 (-0.008,0.024)  | 0.339    | 0.015 (-0.001,0.032)  | 0.072    | <0.001 (-0.019,0.018)  | 0.970        |
| MCMHP                 | 0.001 (-0.001,0.014)  | 0.838    | -0.003 (-0.015,0.010) | 0.649    | -0.008(-0.022,0.006)   | 0.252        |

E2: estradiol; FT: free testosterone; TSH: thyroid stimulating hormone;

Models were adjusted for covariates including mother's age, pre-pregnancy BMI, gestational age, sex of newborn, and GDM status.

Bold italic:  $P < 0.05$

Table S5. Linear regression analysis of relationship between the phthalate metabolites and hormones parameters in overall newborns.

| Phthalate metabolites | T3                    |          | T4                    |          | FT3                   |          | FT4                   |          |
|-----------------------|-----------------------|----------|-----------------------|----------|-----------------------|----------|-----------------------|----------|
|                       | $\beta$ (95%CI)       | <i>P</i> | $\beta$ (95%CI)       | <i>P</i> | $\beta$ (95%CI)       | <i>P</i> | $\beta$ (95%CI)       | <i>P</i> |
| MMP                   | 0.003 (-0.025,0.031)  | 0.845    | 0.003 (-0.028,0.034)  | 0.849    | 0.017 (-0.010,-0.044) | 0.214    | -0.025 (-0.056,0.005) | 0.100    |
| MEP                   | 0.002 (-0.035,0.039)  | 0.922    | 0.007 (-0.033,0.048)  | 0.723    | 0.014 (-0.022,0.050)  | 0.431    | -0.035 (-0.075,0.005) | 0.083    |
| MnBP                  | <0.001 (-0.021,0.022) | 0.979    | -0.004 (-0.027,0.020) | 0.761    | 0.005 (-0.016,-0.026) | 0.671    | -0.014 (-0.037,0.009) | 0.241    |
| MiBP                  | 0.003 (-0.017,0.023)  | 0.779    | -0.003 (-0.025,0.019) | 0.765    | 0.007 (-0.012,0.027)  | 0.456    | -0.011 (-0.033,0.011) | 0.307    |
| MEHP                  | -0.003 (-0.017,0.011) | 0.675    | <0.001 (-0.016,0.015) | 0.959    | 0.006 (-0.008,-0.020) | 0.377    | -0.010 (-0.026,0.005) | 0.192    |
| MEOHP                 | 0.010 (-0.009,0.029)  | 0.293    | -0.001 (-0.022,0.021) | 0.956    | 0.001 (-0.020,0.017)  | 0.883    | -0.003 (-0.024,0.018) | 0.766    |
| MECPP                 | -0.003 (-0.017,0.011) | 0.713    | 0.005 (-0.010,0.021)  | 0.522    | -0.004 (-0.018,0.010) | 0.558    | -0.002 (-0.018,0.013) | 0.765    |
| MEHHP                 | <0.001 (-0.018,0.018) | 0.981    | 0.009 (-0.011,0.029)  | 0.375    | -0.008 (-0.026,0.009) | 0.362    | -0.008 (-0.027,0.012) | 0.442    |
| MCMHP                 | 0.003 (-0.011,0.017)  | 0.685    | 0.002 (-0.014,0.017)  | 0.841    | -0.006 (-0.019,0.008) | 0.396    | -0.002 (-0.017,0.013) | 0.821    |

T3: total triiodothyronine; FT3: free triiodothyronine; T4: total thyroxine; FT4: free thyroxine;

Models were adjusted for covariates including mother's age, pre-pregnancy BMI, gestational age, sex of newborn, and GDM status.

Bold italic: *P* < 0.05
